# Supplementary material for: Loss of Pten Causes Tumor Initiation Following Differentiation of Murine Pluripotent Stem Cells Due to Failed Repression of Nanog
Source: PLOS journal article supplement (doi:10.1371/journal.pone.0016478), 2011-01-27
Supplement: S1 (10.1371/journal.pone.0016478.s001) [file journal.pone.0016478.s001]

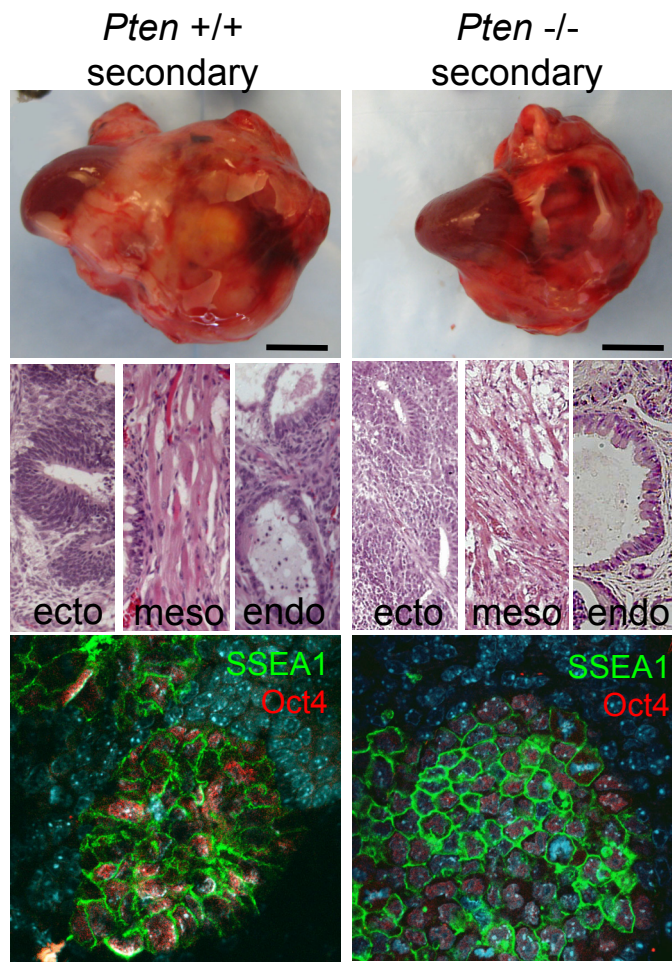

**Figure S1.** Secondary tumor derived from SSEA1 positive ECCs from wild type and *Pten*<sup>-/-</sup> teratomas (Scale bar = 0.5 cm). Histology of tumors showing derivatives of ectoderm (ecto), mesoderm (meso) and endoderm (endo) (200X magnification). Immunofluorescence for SSEA1 and Oct4 in wild type and *Pten*<sup>-/-</sup> secondary tumor (400x magnification).
