# Supplementary material for: Loss of Pten Causes Tumor Initiation Following Differentiation of Murine Pluripotent Stem Cells Due to Failed Repression of Nanog
Source: PLOS journal article supplement (doi:10.1371/journal.pone.0016478), 2011-01-27
Supplement: S2 (10.1371/journal.pone.0016478.s002) [file journal.pone.0016478.s002]

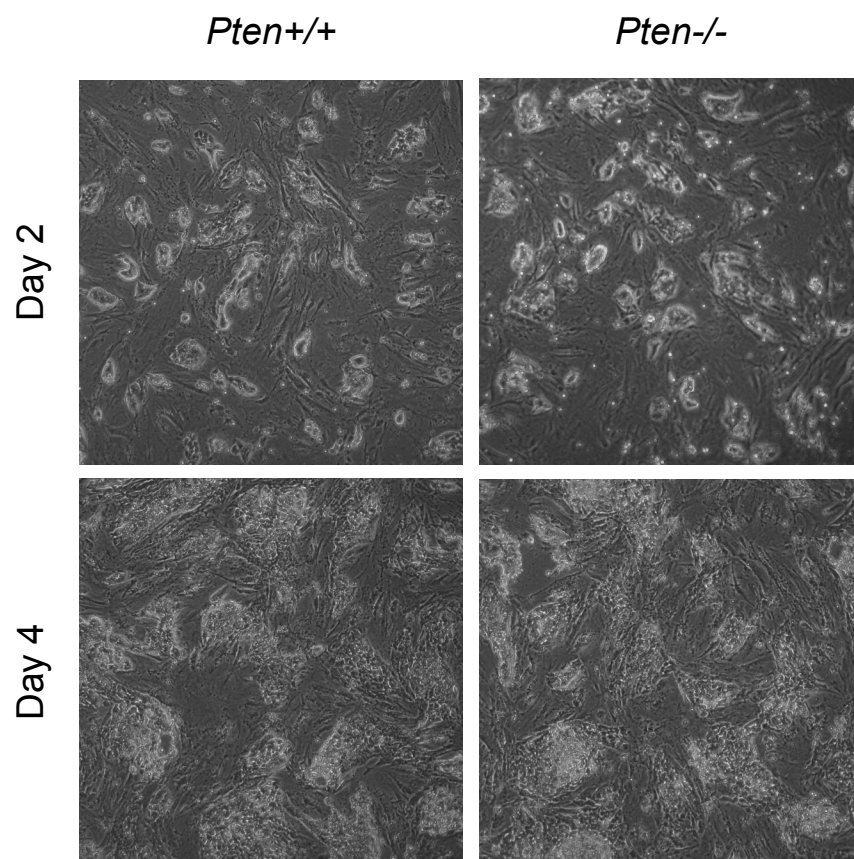

**Figure S2.** Differentiation of wild type and *Pten*<sup>-/-</sup> mESCs on days 2 and 4 in 10μM Retinoic Acid. 100X Magnification.
