# Supplementary material for: Loss of Pten Causes Tumor Initiation Following Differentiation of Murine Pluripotent Stem Cells Due to Failed Repression of Nanog
Source: PLOS journal article supplement (doi:10.1371/journal.pone.0016478), 2011-01-27
Supplement: S3 (10.1371/journal.pone.0016478.s003) [file journal.pone.0016478.s003]

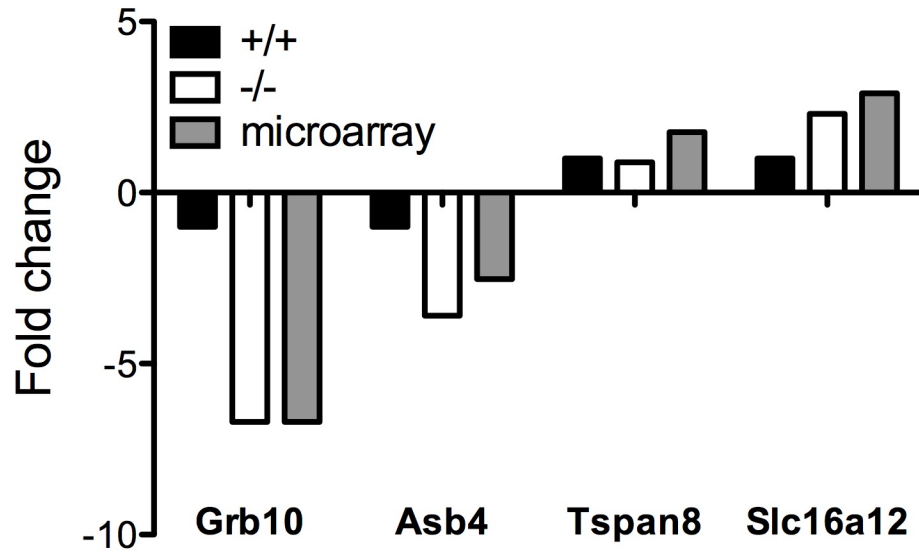

**Figure S3.** RT-PCR results to confirm significantly altered genes identified by SSEA1+c-kit+ microarray.
