# Supplementary material for: Loss of Pten Causes Tumor Initiation Following Differentiation of Murine Pluripotent Stem Cells Due to Failed Repression of Nanog
Source: PLOS journal article supplement (doi:10.1371/journal.pone.0016478), 2011-01-27
Supplement: S6 (10.1371/journal.pone.0016478.s006) [file journal.pone.0016478.s006]

**Table S3: Assays used to evaluate neoplastic progression in pluripotent stem cells and their derivatives**

| Assay                                                            | Cell state under analysis | Genetic lesion or cell line                                                                                                      | Reference    | Pten null |
|------------------------------------------------------------------|---------------------------|----------------------------------------------------------------------------------------------------------------------------------|--------------|-----------|
| Increased proliferation rate                                     | Undifferentiated          | - amp20q11.1-11.2*<br>- Mosaic+12<br>- dup(1)(q21.1q32.1)<br>- t(1;6)(p22;q15)<br>- +1 der(6)t(6;17)(q27;q1)<br>-dup (1p32–1p36) | 4, 6, 9 - 11 | Yes       |
| Decreased apoptosis                                              | Undifferentiated          | - dup(1)(q21.1q32.1)<br>- dup (1p32–1p36)                                                                                        | 5, 6, 9      | No        |
| Decreased spontaneous differentiation                            | Undifferentiated          | - amp20q11.1-11.2*<br>- +1,der(6)t(6;17)(q27;q1)                                                                                 | 4, 10        | No        |
| Increased colony forming capacity (cloning efficiency)           | Undifferentiated          | +1 der(6)t(6;17)(q27;q1)                                                                                                         | 10, 11       | No        |
| Increased teratoma size                                          | Undifferentiated          | - amp20q11.1-11.2*<br>- dup(17)t(17;X)                                                                                           | 4, 7         | Yes       |
| Increased numbers of ECCs in teratomas                           | Undifferentiated          | - 20q11.1-11.2*<br>- MEF-iPS<br>- MOSAIC+12<br>- dup(1)(q21.1q32.1)<br>- t(1;6)(p22;q15)                                         | 3, 4, 9      | No        |
| Re-transplant of tumor ECCs                                      | Teratoma stem cells       | - dup(17)t(17;X)<br>- multiple                                                                                                   | 7, 17        | Yes       |
| Increased numbers of failed to differentiate cells in vitro      | Differentiated            | - amp20q11.1-11.2*<br>- MEF-iPs                                                                                                  | 3, 4         | No        |
| Increased re-plating efficiency of failed to differentiate cells | Differentiated            | Pten null mutation                                                                                                               | This study   | Yes       |

(amp = amplification); \* = detected by array CGH (subkaryotypic lesion); dup = duplication; t= translocation.
